# Supplementary material for: Long Term Risks to Neonatal Health from Exposure to War—9 Years Long Survey of Reproductive Health and Contamination by Weapon-Delivered Heavy Metals in Gaza, Palestine
Source: MDPI journal article supplement (doi:10.3390/ijerph17072538), 2020-04-08
Supplement: s1 [file s1]

**Table S1.** Association between phenotypes of singleton newborn and parents characteristics, risky exposures and reproductive history in 2018-2019.

| Features                                    | Birth Defects (N=77) |      |             |       | Preterm Birth (N=305) |      |            |       | Low Birth Weight (N = 113) |      |            |       |
|---------------------------------------------|----------------------|------|-------------|-------|-----------------------|------|------------|-------|----------------------------|------|------------|-------|
|                                             | Ca/Nc                | OR   | 95%CI       | p     | Ca/Nc                 | OR   | 95%CI      | p     | Ca/Nc                      | OR   | 95%CI      | p     |
| <b>Parents characteristics</b>              |                      |      |             |       |                       |      |            |       |                            |      |            |       |
| <i>Mother age (year)</i>                    |                      |      |             | 0.034 |                       |      |            | 0.506 |                            |      |            | 0.921 |
| < 20                                        | 7/477                | Ref  | -           |       | 36/431                | Ref  | -          |       | 13/415                     | Ref  | -          |       |
| 20-29                                       | 44/3008              | 1.0  | 0.45 – 2.2  |       | 196/2783              | 0.84 | 0.58 – 1.2 |       | 72/2698                    | 0.85 | 0.47 – 1.6 |       |
| 30-39                                       | 18/930               | 1.3  | 0.55 – 3.2  |       | 69/851                | 0.97 | 0.64 – 1.5 |       | 23/823                     | 0.89 | 0.45 – 1.8 |       |
| ≥ 40                                        | 6/90                 | 4.5  | 1.5 – 13.8  |       | 4/85                  | 0.56 | 0.20 – 1.6 |       | 3/82                       | 1.2  | 0.33 – 4.2 |       |
| <i>Mother education</i>                     |                      |      |             | 0.461 |                       |      |            | 0.360 |                            |      |            | 0.063 |
| No school /primary                          | 15/747               | Ref  | -           |       | 56/681                | Ref  | -          |       | 26/652                     | Ref  | -          |       |
| Secondary or more                           | 61/3783              | 0.80 | 0.45 – 1.4  |       | 249/3492              | 0.87 | 0.64 – 1.2 |       | 87/3387                    | 0.64 | 0.41 – 1.0 |       |
| <i>Working mother</i>                       |                      |      |             | 0.491 |                       |      |            | 0.185 |                            |      |            | 0.265 |
| No                                          | 70/4298              | Ref  | -           |       | 285/3962              | Ref  | -          |       | 105/3839                   | Ref  | -          |       |
| Yes                                         | 5/219                | 1.4  | 0.56 – 3.5  |       | 20/199                | 1.4  | 0.87 – 2.2 |       | 8/188                      | 1.6  | 0.75 – 3.2 |       |
| <i>Primiparity</i>                          |                      |      |             | 0.871 |                       |      |            | 0.409 |                            |      |            | 0.122 |
| No                                          | 52/3098              | Ref  | -           |       | 201/2864              | Ref  | -          |       | 70/2783                    | Ref  | -          |       |
| Yes                                         | 25/1431              | 1.0  | 0.64 – 1.7  |       | 102/1309              | 1.1  | 0.87 – 1.4 |       | 43/1256                    | 1.4  | 0.93 – 2.0 |       |
| <i>Previous children with birth defects</i> |                      |      |             | 0.600 |                       |      |            | 0.095 |                            |      |            | n.e.  |
| No                                          | 76/4495              | Ref  | -           |       | 299/4143              | Ref  | -          |       | 113/4009                   | Ref  | -          |       |
| Yes                                         | 1/33                 | 1.8  | 0.24 – 13.3 |       | 5/28                  | 2.5  | 0.95 – 6.5 |       | 0/28                       | n.e. | n.e.       |       |
| <i>Birth defects in the mother's family</i> |                      |      |             | 0.527 |                       |      |            | 0.061 |                            |      |            | 0.185 |
| No                                          | 72/4404              | Ref  | -           |       | 291/4062              | Ref  | -          |       | 112/3931                   | Ref  | -          |       |
| Yes                                         | 3/123                | 1.5  | 0.46 – 4.8  |       | 14/109                | 1.8  | 1.0 – 3.2  |       | 1/106                      | 0.33 | 0.05 – 2.4 |       |
| <i>Father age (year)</i>                    |                      |      |             | 0.062 |                       |      |            | 0.922 |                            |      |            | 0.370 |
| < 29                                        | 36/2498              | Ref  | -           |       | 170/2299              | Ref  | -          |       | 63/2225                    | Ref  | -          |       |
| 30-39                                       | 25/1602              | 1.1  | 0.65 – 1.8  |       | 110/1476              | 1.0  | 0.79 – 1.3 |       | 42/1425                    | 1.0  | 0.70 – 1.5 |       |
| ≥ 40                                        | 13/397               | 2.3  | 1.2 – 4.3   |       | 25/367                | 0.92 | 0.60 – 1.4 |       | 6/360                      | 0.59 | 0.26 – 1.4 |       |
| <i>Father education</i>                     |                      |      |             | 0.684 |                       |      |            | 0.093 |                            |      |            | 0.161 |
| No school/primary                           | 21/1189              | Ref  | -           |       | 93/1086               | Ref  | -          |       | 36/1044                    | Ref  | -          |       |
| Secondary or more                           | 53/3338              | 0.90 | 0.54 – 1.5  |       | 212/3085              | 0.80 | 0.62 – 1.0 |       | 77/2993                    | 0.75 | 0.50 – 1.1 |       |
| <i>Father chronic diseases</i>              |                      |      |             | 0.061 |                       |      |            | 0.685 |                            |      |            | n.e.  |
| No                                          | 72/4507              | Ref  | -           |       | 303/4152              | Ref  | -          |       | 113/4018                   | Ref  | -          |       |
| Yes                                         | 2/22                 | 5.7  | 1.3- 24.7   |       | 2/20                  | 1.4  | 0.32 – 5.9 |       | 0/2                        | n.e. | n.e.       |       |
| <i>Birth defects in the father family</i>   |                      |      |             | 0.199 |                       |      |            | 0.746 |                            |      |            | 0.531 |
| No                                          | 70/4407              | Ref  | -           |       | 296/4061              | Ref  | -          |       | 111/3929                   | Ref  | -          |       |
| Yes                                         | 4/120                | 2.1  | 0.75 – 5.8  |       | 9/110                 | 1.1  | 0.56 – 2.2 |       | 2/108                      | 0.66 | 0.16 – 2.7 |       |
| <i>Parents consanguinity</i>                |                      |      |             | 0.283 |                       |      |            | 0.149 |                            |      |            | 0.964 |
| No                                          | 38/2732              | Ref  | -           |       | 170/2528              | Ref  | -          |       | 68/2448                    | Ref  | -          |       |
| Cousin                                      | 13/660               | 1.4  | 0.75 – 2.7  |       | 44/608                | 1.1  | 0.76 – 1.5 |       | 16/588                     | 0.98 | 0.56 – 1.7 |       |
| Relative                                    | 23/1122              | 1.5  | 0.87 – 2.5  |       | 90/1024               | 1.3  | 1.0 – 1.7  |       | 29/990                     | 1.1  | 0.68 – 1.6 |       |

|                                           |         |      |             |         |          |      |             |         |          |      |            |         |
|-------------------------------------------|---------|------|-------------|---------|----------|------|-------------|---------|----------|------|------------|---------|
| Delivery features                         |         |      |             |         |          |      |             |         |          |      |            |         |
| <i>Infant sex</i>                         |         |      |             |         |          |      |             |         |          |      |            |         |
| Male                                      | 36/2339 | Ref  | -           | 0.441   | 177/2144 | Ref  | -           | 0.024   | 41/2095  | Ref  | -          | 0.003   |
| Female                                    | 40/2174 | 1.2  | 0.76 – 1.9  |         | 127/2015 | 0.76 | 0.60 – 0.97 |         | 68/1934  | 1.8  | 1.2 – 2.7  |         |
| <i>Gestational diabetes</i>               |         |      |             |         |          |      |             |         |          |      |            |         |
| No                                        | 73/4292 | Ref  | -           | 0.276   | 282/3959 | Ref  | -           | 0.082   | 102/3836 | Ref  | -          | 0.043   |
| Yes                                       | 2/237   | 0.50 | 0.12 – 2.0  |         | 23/213   | 1.5  | 0.97 – 2.4  |         | 11/202   | 2.0  | 1.1 – 3.9  |         |
| <i>Type of delivery</i>                   |         |      |             |         |          |      |             |         |          |      |            |         |
| Vaginal                                   | 56/3562 | Ref  | -           | 0.218   | 213/3304 | Ref  | -           | < 0.001 | 70/3216  | Ref  | -          | < 0.001 |
| Cesarean                                  | 21/964  | 1.4  | 0.83 – 2.3  |         | 93/864   | 1.7  | 1.3 – 2.2   |         | 43/818   | 2.4  | 1.6 – 3.6  |         |
| <i>In vitro fertilization</i>             |         |      |             |         |          |      |             |         |          |      |            |         |
| No                                        | 76/4493 | Ref  | -           | 0.734   | 301/4140 | Ref  | -           | 0.214   | 110/4009 | Ref  | -          | 0.092   |
| Yes                                       | 1/41    | 1.4  | 0.20 – 10.6 |         | 5/36     | 1.9  | 0.74 – 4.9  |         | 3/33     | 3.3  | 1.0 – 11.0 |         |
| Residence features                        |         |      |             |         |          |      |             |         |          |      |            |         |
| <i>Residence area</i>                     |         |      |             |         |          |      |             |         |          |      |            |         |
| North                                     | 11/669  | Ref  | -           | 0.584   | 48/616   | Ref  | -           | < 0.001 | 10/603   | Ref  | -          | 0.158   |
| Gaza                                      | 62/3723 | 1.0  | 0.54 – 1.9  |         | 229/3447 | 0.85 | 0.62 – 1.2  |         | 100/3330 | 1.8  | 0.94 – 3.5 |         |
| Middle                                    | 4/134   | 1.8  | 0.57 – 5.8  |         | 27/107   | 3.2  | 1.9 – 5.4   |         | 3/103    | 1.8  | 0.48 – 6.5 |         |
| <i>House hit in 2014</i>                  |         |      |             |         |          |      |             |         |          |      |            |         |
| No                                        | 57/3513 | Ref  | -           | 0.853   | 216/3254 | Ref  | -           | 0.007   | 89/3150  | Ref  | -          | 0.919   |
| Yes                                       | 14/912  | 0.95 | 0.52 – 1.7  |         | 80/825   | 1.5  | 1.1 – 1.9   |         | 22/798   | 0.98 | 0.61 – 1.6 |         |
| <i>Nearby house hit in 2014</i>           |         |      |             |         |          |      |             |         |          |      |            |         |
| No                                        | 47/3583 | Ref  | -           | 0.004   | 230/3305 | Ref  | -           | 0.148   | 96/3191  | Ref  | -          | 0.159   |
| Yes                                       | 25/903  | 2.1  | 1.3 – 3.4   |         | 71/829   | 1.2  | 0.93 – 1.6  |         | 17/810   | 0.70 | 0.41 – 1.2 |         |
| <i>Rubble use after 2014</i>              |         |      |             |         |          |      |             |         |          |      |            |         |
| No                                        | 25/1708 | Ref  | -           | 0.483   | 125/1533 | Ref  | -           | 0.143   | 45/1476  | Ref  | -          | 0.482   |
| Yes                                       | 49/2818 | 1.2  | 0.73 – 1.9  |         | 180/2637 | 0.84 | 0.66 – 1.1  |         | 68/2560  | 0.87 | 0.59 – 1.3 |         |
| <i>House near a sewage</i>                |         |      |             |         |          |      |             |         |          |      |            |         |
| No                                        | 66/4165 | Ref  | -           | 0.388   | 276/3841 | Ref  | -           | 0.313   | 107/3714 | Ref  | -          | 0.280   |
| Yes                                       | 8/359   | 1.4  | 0.67 – 3.0  |         | 29/327   | 1.2  | 0.83 – 1.8  |         | 6/320    | 0.65 | 0.28 – 1.5 |         |
| <i>House near a garbage</i>               |         |      |             |         |          |      |             |         |          |      |            |         |
| No                                        | 73/4336 | Ref  | -           | 0.164   | 296/3989 | Ref  | -           | 0.236   | 109/3859 | Ref  | -          | 0.671   |
| Yes                                       | 1/188   | 0.32 | 0.04 – 2.3  |         | 9/179    | 0.68 | 0.34 – 1.3  |         | 4/175    | 0.81 | 0.29 – 2.2 |         |
| <i>House near agricultural activities</i> |         |      |             |         |          |      |             |         |          |      |            |         |
| No                                        | 65/3600 | Ref  | -           | 0.062   | 229/3327 | Ref  | -           | 0.055   | 94/3217  | Ref  | -          | 0.353   |
| Yes                                       | 9/926   | 0.54 | 0.27 – 1.1  |         | 76/843   | 1.3  | 1.0 – 1.7   |         | 19/819   | 0.79 | 0.48 – 1.3 |         |
| <i>House near factories</i>               |         |      |             |         |          |      |             |         |          |      |            |         |
| No                                        | 66/4411 | Ref  | -           | < 0.001 | 298/4062 | Ref  | -           | 0.749   | 113/3928 | Ref  | -          | n.e.    |
| Yes                                       | 8/115   | 4.6  | 2.2 – 9.9   |         | 7/108    | 0.88 | 0.41 – 1.9  |         | 0/108    | n.e. | n.e.       |         |

|                                    |         |      |            |       |          |      |            |  |          |      |            |
|------------------------------------|---------|------|------------|-------|----------|------|------------|--|----------|------|------------|
| Lifestyle exposures                |         |      |            |       |          |      |            |  |          |      |            |
| <i>Folic acid during pregnancy</i> |         |      |            | n.e.  |          |      |            |  | n.e.     |      |            |
| No                                 | 0/12    | Ref  | -          |       | 0/12     | Ref  | -          |  | 0/12     | Ref  | -          |
| Yes                                | 71/4299 | n.e. | n.e.       |       | 297/3955 | n.e. | n.e.       |  | 105/3830 | n.e. | n.e.       |
| <i>Mother fish consumption</i>     |         |      |            | 0.479 |          |      |            |  | 0.317    |      |            |
| No                                 | 13/659  | Ref  | -          |       | 50/595   | Ref  | -          |  | 10/582   | Ref  | -          |
| Yes                                | 61/3866 | 0.80 | 0.44 – 1.5 |       | 255/3574 | 0.85 | 0.62 – 1.2 |  | 103/3453 | 1.7  | 0.90 – 3.3 |
| <i>Parents use of fertilizers</i>  |         |      |            | 0.386 |          |      |            |  | 0.048    |      |            |
| No                                 | 60/3879 | Ref  | -          |       | 250/3586 | Ref  | -          |  | 96/3473  | Ref  | -          |
| Yes                                | 13/638  | 1.3  | 0.72 – 2.4 |       | 55/575   | 1.4  | 1.0 – 1.9  |  | 17/554   | 1.1  | 0.66 – 1.9 |

Ca/Nc = Cases / Non-cases; n.e. = not evaluable.
