# Supplementary material for: Long Term Risks to Neonatal Health from Exposure to War—9 Years Long Survey of Reproductive Health and Contamination by Weapon-Delivered Heavy Metals in Gaza, Palestine
Source: MDPI journal article supplement (doi:10.3390/ijerph17072538), 2020-04-08
Supplement: s1 [file s1]

SHIFA MATERNITY 2018-19 file number

interviewer Initials and date of birth

**MOTHER** ID mother name mother age father age

parents are cousin=1 relative=2 outside=3

mother telef. residence North=1 Gaza=2 Middle=3 KanY=4 Rafah=5

Mother preeclampsia 0-no,1=yes Broken Membranes 0-no,1=yes

Delivery: 1- normal, 2- caesarean IVF: 0-no ,1=yes

**CHILD** gestational age in weeks weight in grams

sex M male F female single =1 twins=2 more=3

APGAR total score child health : excellent=1 good=2 fair=3 bad=4 dead=5

this child preterm 0-no 1=yes this child birth defect 0-no 1=yes

if birth defect Diagnosis and CD10 class

| <b>Other children</b>           | N | year born             | sex                            | Diagnosis/CD10 |
|---------------------------------|---|-----------------------|--------------------------------|----------------|
| previous healthy children       |   |                       |                                |                |
| Previous children birth defect  |   |                       |                                |                |
| Previous children preterm       |   |                       | Alive? Y or N                  |                |
| Previous children still born    |   |                       | Birth defect? BD<br>Preterm? P |                |
| Previous miscarriages           |   |                       | BD                             |                |
| Previous child dead after birth |   | Age at death (months) | normal<br>BD<br>preterm        | Cause of death |

## **MOTHER**

Education 0-no school 1-primary 2-econdary 3-diploma 4-master 5-university Mother

Occupation presen/previous

chronic diseases 0-none 1=yes which disease Mother diseases during pregnancy 0-none 1=yes which disease

relatives with birth defects and type (ICD10 or diagnosis) 0-none 1-parents 2-  
brother or sister 3-cousin 4-child of brother 5-child of sister

brothers healthy N

brother's children healthy N

sisters healthy N

sisters children healthy N

## **FATHER**

Education 0-no school 1-primary 2-econdary 3-diploma 4-master 5-university or

Occupation present / previous diseases

relatives with birth defects and type (ICD10 or diagnosis) 0-none 1-parents 2-  
 brother or sister 3-cousin 4-child of brother 5-child of sister

brothers healthy N Father brother's children healthy N

sisters healthy N Father sisters children healthy N

**MOTHER** where you lived during 2014 attacks? Do you still live there?

Source drinking-cooking water: 1-well 2-pipes 3-delivery 4-bottle

source of food 1-local 2-UNWRA 3-Israel 4-Egypt 5-Turkey

near your house there is 1- open sewage, 2-sewage plants, 3- disposal of garbage , 4-  
 garbage burning in open air, 0- none

your house is near 1-agricultural land? 2-to factories....specify, 0-none Parents use:  
 1-pesticides 2-insecticide 3-weed killers 4-other chemicals 0- none

was your house hit in attacks in 2014? 0-no answer 1-yes 2- no

where you inside? 0-no answer 1-yes, 2- no

residence attacked with 1-Bombs, 2-air/navy missiles, 3-artillery mortars, 4-incendiary

in 2014 was any house hit next to your residence at the time? 1-yes 0-no

after 2014 attacks did you 1-clean rubble , 2-reuse items from attacked building , 3-rebuilt on site of attacked  
 building, 4-used brick or reused materials to fix/build the house , 0- none

after 2014 bombing-attacks you found objects from weapons 1-in your house, 2-near your house 0-  
 none

during pregnancy has taken 1-painkiller 2-antidepressants 3-Vitamins 4-  
 Folic acid 5- Iron 6-other medicines(specify) 0-none

smoke during pregnancy 0- no, 1-yes

diet in pregnancy 1-excellent 2-good 3-poor

eat fish 0-never 1-once/month 2-twice/month 3-once/week 4-more  
 times/week

eat meat/chicken 0-never, 1-once/month, 2-twice/month 3-once/week 4-  
 more times/week

eat milk products (yogurt, cheeses): 0-never, 1-once/month, 2-twice/month  
 3-once/week 4-more times/week

eat eggs 0-never, 1-once/month, 2-twice/month 3-once/week 4-more  
 times/week

eats fresh fruit or vegetables 0-never 1-once/ month 2-twice/month 3-once/week 4-more  
 times/week

eat legumes 0-never, 1-once/month 2-twice/month 3-once/week  
 4-more times/week

consensus x hair samples and x follow up
